# Supplementary material for: Evaluation and Treatment of Obesity and Its Comorbidities: 2022 Update of Clinical Practice Guidelines for Obesity by the Korean Society for the Study of Obesity
Source: PubMed Central journal article supplement — J Obes Metab Syndr. 2023 Mar 22;32(1):1–24. doi: 10.7570/jomes23016 (PMC10088549; doi:10.7570/jomes23016), 2023-03-22
Supplement: jomes-32-1-1-supple1.pdf [file jomes-32-1-1-supple1.pdf]

**Supplementary Table 1.** Levels of evidence and grades of recommendation<sup>7</sup>

|                         | Definition                                                                                                                                                                                  |                      |
|-------------------------|---------------------------------------------------------------------------------------------------------------------------------------------------------------------------------------------|----------------------|
| Level of evidence       |                                                                                                                                                                                             |                      |
| A                       | Good research-based evidence to support the recommendation<br>Data derived from at least one randomized controlled trial, meta-analysis, or systematic review                               |                      |
| B                       | Fair research-based evidence to support the recommendation<br>Data derived from at least one well-designed cohort or case-control study without randomization                               |                      |
| C                       | Fair evidence but insufficient to support the recommendation<br>Data derived from case series or observational studies                                                                      |                      |
| D                       | Recommendation based on expert opinion and panel consensus<br>Consensus of expert opinions based on experience                                                                              |                      |
| Grade of recommendation |                                                                                                                                                                                             |                      |
| Class I                 | The recommendation is supported by level of evidence A.<br>Clinically important outcomes and the study population is representative of the target population of the recommendation.         | Is recommended       |
| Class IIa               | The recommendation is supported by level of evidence B.<br>Clinically important or validated surrogate outcomes.                                                                            | Should be considered |
| Class IIb               | The recommendation is supported by level of evidence C or D.<br>The outcome is an unvalidated surrogate condition but clinically important outcome.                                         | May be considered    |
| Class III               | The recommendation is supported by level of evidence C or D.<br>Outcome is an unvalidated surrogate for a clinically important population, or the applicability of the study is irrelevant. | Not recommended      |
