# Supplementary figures and images for: Evaluation and Treatment of Obesity and Its Comorbidities: 2022 Update of Clinical Practice Guidelines for Obesity by the Korean Society for the Study of Obesity
Source: PubMed Central journal article supplement — J Obes Metab Syndr. 2023 Mar 22;32(1):1–24. doi: 10.7570/jomes23016 (PMC10088549; doi:10.7570/jomes23016), 2023-03-22

## Graphical Abstract

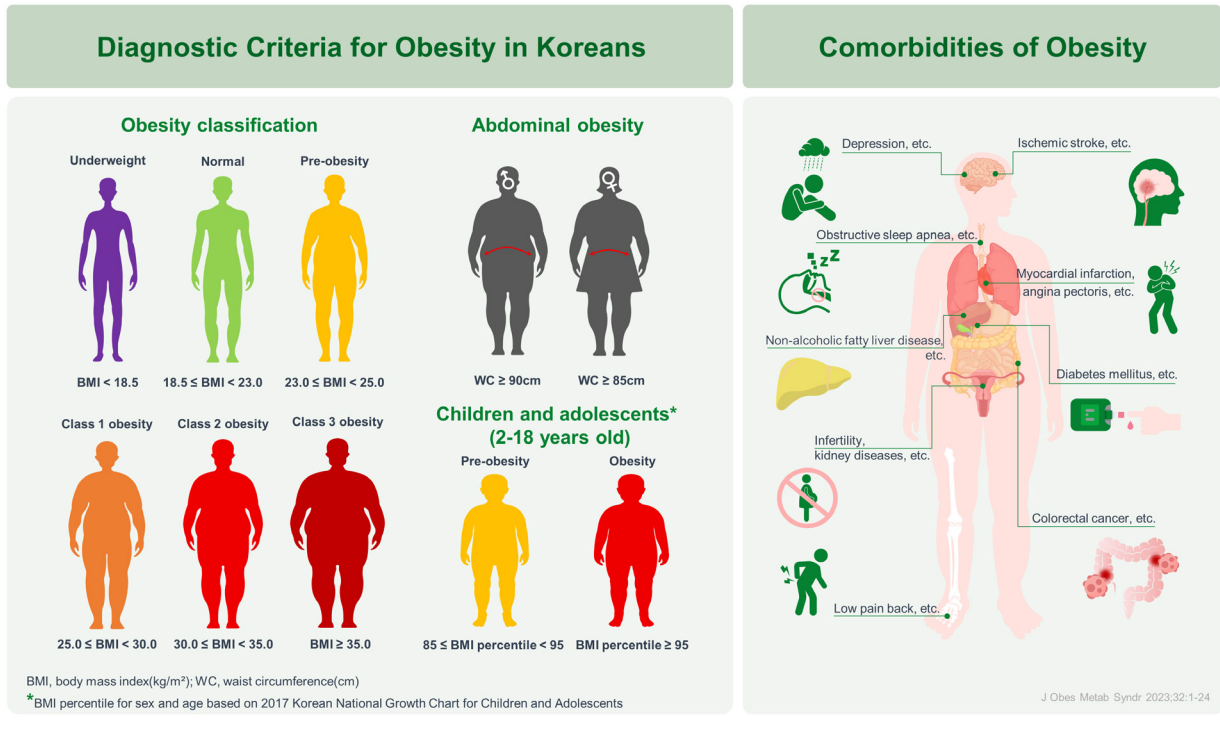

Supplement: jomes-32-1-1-supple2.pdf [file jomes-32-1-1-supple2.pdf]
